# Supplementary material for: An empirical model of high-latitude ionospheric conductances based on EISCAT observations
Source: Copernicus journal article supplement (doi:10.5194/angeo-43-755-2025), 2025-12-04
Supplement: Supplementary file [file angeo-43-755-2025-supplement-title-page.pdf › angeo-43-755-2025-supplement-title-page.pdf]

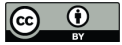

## *Supplement of*

# **An empirical model of high-latitude ionospheric conductances based on EISCAT observations**

**Liisa Juusola et al.**

*Correspondence to:* Liisa Juusola (liisa.juusola@fmi.fi)

- [angeo-43-755-2025-supplement-title-page.pdf](#)
- [alt\\_cosine](#)
  - README
  - alt\_cosine.py
  - alt\_cosine\_and\_MoenBrekke.png
  - chapman\_euv\_productionvalues.txt
  - make\_alt\_cos\_figure.py

The copyright of individual parts of the supplement might differ from the article licence.
